# Supplementary material
Source: Springer Nature journal article supplement (https://www.springermedizin.de/resource/supplementary/12936_2012_2489_MOESM8_ESM.pdf/9542768)

a) Malaria admissions/1000, East province

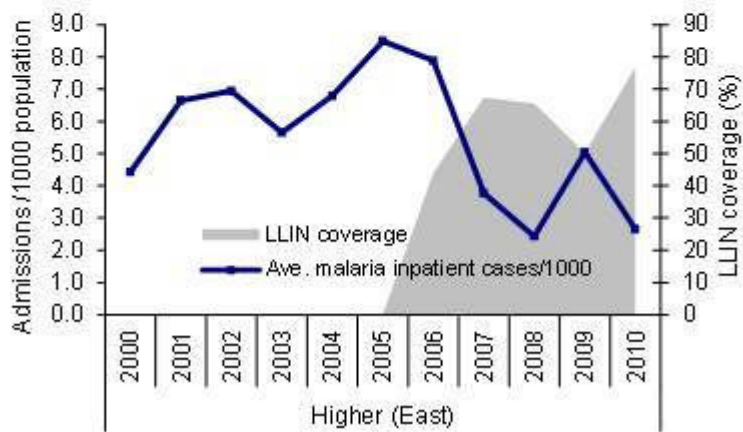

b) Malaria admissions/1000, other provinces

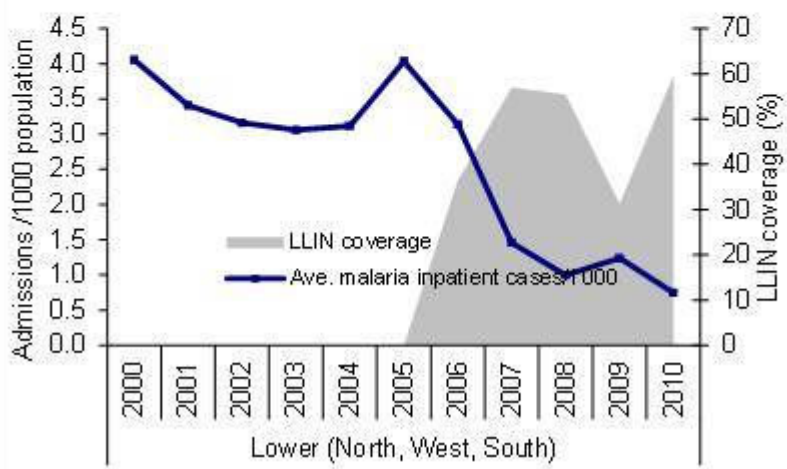

c) Malaria deaths/100,000, East province

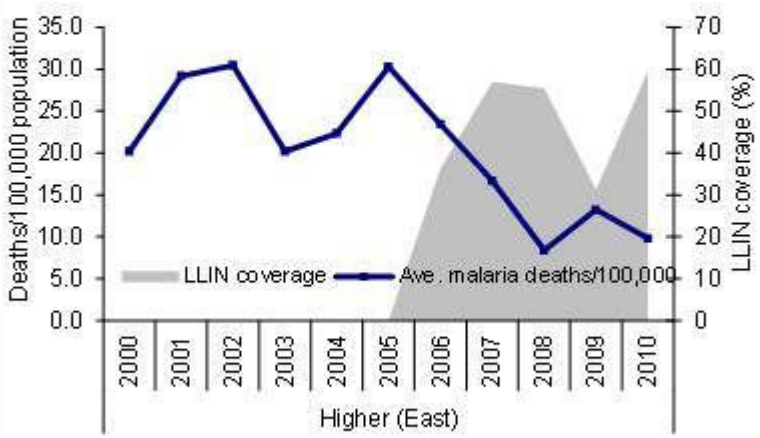

d) Malaria deaths/100,000, other provinces

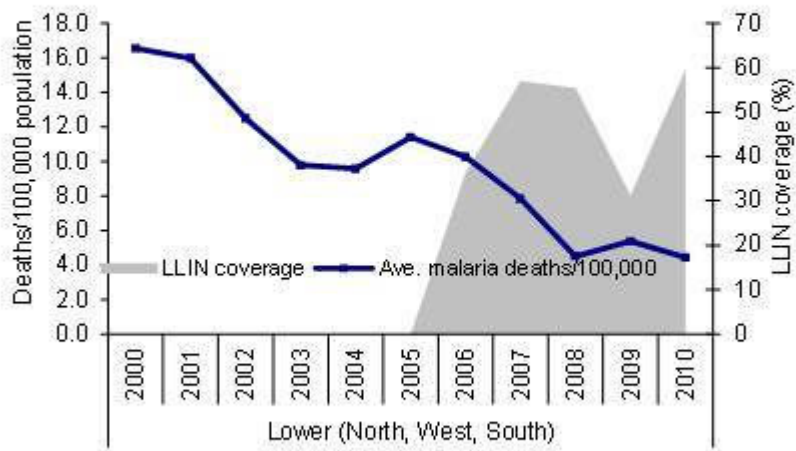

Supplement: MOESM8 [file 9542768]
